# Supplementary material for: Hydride-based antiperovskites with soft anionic sublattices as fast alkali ionic conductors
Source: PubMed Central journal article supplement (PMC7794446; doi:10.1038/s41467-020-20370-2), 2021-01-08
Supplement: 41467_2020_20370_MOESM1_ESM.pdf [file 41467_2020_20370_MOESM1_ESM.pdf]

## Supplementary Information

### Hydride-based antiperovskites with soft anionic sublattices as fast alkali ionic conductors

Shenghan Gao,<sup>a,†</sup> Thibault Broux,<sup>a,†</sup> Susumu Fujii,<sup>b,†</sup> Cedric Tassel,<sup>a,\*</sup> Kentaro Yamamoto,<sup>c</sup> Yao Xiao,<sup>c</sup> Itaru Oikawa,<sup>d</sup> Hitoshi Takamura,<sup>d</sup> Hiroki Ubukata,<sup>a</sup> Yuki Watanabe,<sup>a</sup> Kotaro Fujii,<sup>e</sup> Masatomo Yashima,<sup>e</sup> Akihide Kuwabara,<sup>b</sup> Yoshiharu Uchimoto,<sup>c</sup> and Hiroshi Kageyama<sup>a,\*</sup>

<sup>a</sup>*Department of Energy and Hydrocarbon Chemistry, Graduate School of Engineering, Kyoto University, Nishikyo-ku, Kyoto 615-8510, Japan*

<sup>b</sup>*Nanostructures Research Laboratory, Japan Fine Ceramics Center, Nagoya 456-8587, Japan*

<sup>c</sup>*Graduate School of Human and Environmental Studies, Kyoto University, Sakyo-ku, Kyoto 606-8501, Japan*

<sup>d</sup>*Department of Materials Science, Graduate School of Engineering, Tohoku University, Sendai 980-8579, Japan*

<sup>e</sup>*Department of Chemistry, School of Science, Tokyo Institute of Technology, 2-12-1-W4-17 O-okayama, Meguro-ku, Tokyo 152-8551, Japan*

| Table of Contents:                                                                | Page                        |
|-----------------------------------------------------------------------------------|-----------------------------|
| Section 1. Supplementary Methods -----                                            | S3-S4                       |
| Section 2. Crystal structure analysis of $M_3HCh$ antiperovskites -----           | S5-S14                      |
|                                                                                   | Supplementary Figures 1-9   |
|                                                                                   | Supplementary Tables 1-5    |
| Section 3. Size-flexibility of hydride anion -----                                | S15-S18                     |
|                                                                                   | Supplementary Figure 10-11  |
|                                                                                   | Supplementary Table 6-7     |
| Section 4. Ambient synthesis of $Na_3HTe$ -----                                   | S19                         |
|                                                                                   | Supplementary Figure 12     |
|                                                                                   | Supplementary Table 8       |
| Section 5. Electronic band structures at 0 GPa-----                               | S20                         |
|                                                                                   | Supplementary Figure 13     |
| Section 6. Phonon band structures at 0 and 5 GPa -----                            | S21-S23                     |
|                                                                                   | Supplementary Figure 14     |
| Section 7. $Na^+$ migration pathways in orthorhombic $Na_3HS$ -----               | S24                         |
|                                                                                   | Supplementary Figure 15     |
| Section 8. The migration barriers and defect formation energies in $M_3HCh$ ----- | S25                         |
|                                                                                   | Supplementary Figure 16     |
|                                                                                   | Supplementary Table 9       |
| Section 9. Ionic diffusion -----                                                  | S26-S30                     |
|                                                                                   | Supplementary Figures 17-21 |
|                                                                                   | Supplementary Table 10      |
| Section 10. Supplementary references -----                                        | S31                         |

## Section 1. Supplementary Methods

**Theoretical Calculations.** Total energy calculations and structural optimizations of M<sub>3</sub>HCh, MH and M<sub>2</sub>Ch under 0 and 5 GPa were performed with Vienna *Ab initio* Simulation Package (VASP) (Kresse, G. & Hafner, J. *Phys. Rev. B* **1993**, 47, 558–561; Kresse, G. & Furthmüller, J. *Phys. Rev. B* **1996**, 54, 11169–11186), using the plane-wave basis projector augmented wave (PAW) method (Blöchl, P. E. *Phys. Rev. B* **1994**, 50, 17953–17979) and the generalized gradient approximation (GGA) in the form of PBEsol (Perdew, J. P. *et al. Phys. Rev. Lett.* **2008**, 100, 136406). We used PAW potentials with the following valence configurations: 1s<sup>2</sup>2s<sup>1</sup> for Li, 2p<sup>6</sup>3s<sup>1</sup> for Na, 1s<sup>1</sup> for H, 3s<sup>2</sup>3p<sup>4</sup> for S, 4s<sup>2</sup>4p<sup>4</sup> for Se and 5s<sup>2</sup>5p<sup>4</sup> for Te. An energy cutoff of 650 eV was used for the plane-wave basis set. The criteria of convergence for electronic self-consistent cycle and structure optimization were set to be 1.0 × 10<sup>-6</sup> eV/atom and 1.0 × 10<sup>-3</sup> eV/Å, respectively. The Brillouin zones were sampled with  $\Gamma$ -centered *k*-point meshes with the spacing of 0.2 Å<sup>-1</sup> (and 0.1 Å<sup>-1</sup> for the calculations of electronic density of states). Enthalpies of M<sub>3</sub>HCh, MH and M<sub>2</sub>Ch were calculated according to the following equation:

$$H(p) = U(V) + pV \quad (1),$$

where *H*, *U*, *p* and *V* are enthalpy, internal energy, pressure and volume.

Phonon dispersions and vibrational free energies were calculated using the Parlinski-Li-Kawazoe method (Parlinski, K., Li, Z. Q. & Kawazoe, Y. *Phys. Rev. Lett.* **1997**, 78, 4063–4066) as implemented in Phonopy (Togo, A. & Tanaka, I. *Scr. Mater.* **2015**, 108, 1–5). Dynamical matrixes were constructed from real space interatomic force constants. To determine the force constants, symmetrically nonequivalent atomic displacements with the distance of 0.01 Å were introduced to the stationary atomic positions. For these phonon calculations, 2 × 2 × 2 supercells were used for all compounds after the preliminary tests using 3 × 3 × 3 and 4 × 4 × 4 supercells of Li<sub>3</sub>HS. Vibrational free energies, *F*<sub>vib</sub>, were calculated with dense *q*-point meshes containing at least 560 *q*-points. Gibbs free energies of M<sub>3</sub>HCh, MH and M<sub>2</sub>Ch were calculated as below:

$$G(T, p) = U(V) + pV + v_{jb}(T, V) = H(p) + v_{jb}(T, V) \quad (2),$$

where *G* and *T* are Gibbs free energy and temperature. In the present study, only vibrational entropy was considered, not configurational entropy. Phonon band centers for M<sup>+</sup> ions were calculated as the average phonon frequencies, *W*<sub>ave</sub>, by the following equation:  $f W. g(W) dW$

$$W_{ave} = \frac{\int f g(W) dW}{\int g(W) dW} \quad (3),$$

where *W* and *g* are phonon frequency and phonon density of states (DOS). Imaginary frequencies were neglected for the calculations.

The force constant *k*<sub>rot</sub> with respect to the phonon mode at *M* point, which corresponds to the rotational motion of a HM<sub>6</sub> octahedron, was estimated by  $k_{rot} = W_{rot}^2 \cdot mM$ , where *W*<sub>rot</sub> and *mM* are the frequency of the rotational phonon mode and the atomic mass of *M*, respectively. This is in accordance with the equation of simple harmonic motion  $W =$

$$\sqrt{k/m}.$$

The Bader population analysis, which partitions a charge density grid into the Bader region of each ion, was performed to investigate the size variation of each ion upon changing M and Ch species and applying external pressure (Tang, W., Sanville, E. & Henkelman, G. *J. Phys. Condens. Matter* **2009**, 21, 084204). The partition results for cubic Li<sub>3</sub>HS are shown in Supplementary Figure 11 as an example. The volume of the partitioned region (Bader volume) was used to estimate the radius of each ion (Bader radius)

4

according to the equation  $V_B = \frac{4}{3} \pi r_B^3$ , where  $V_B$  and  $r_B$  are the Bader volume and radius, respectively (Harashima, Y., Terakura, K., Kino, H., Ishibashi, S. & Miyake, T. *J. Appl. Phys.* **2016**, 120, 203904). Note that the Bader radii are larger than the commonly used ionic radii such as Shannon ionic radii since Bader regions are space filling whereas spheres are not.

The nudged elastic band (NEB) calculations (Mills, G., Jónsson, H. & Schenter, G. K. *Surf. Sci.* **1995**, 324, 305–337) were performed to estimate energy barriers for ion migration mediated by vacancy or interstitial defects. The climbing image NEB method (Henkelman, G., Uberuaga, B. P. & Jónsson, H. *J. Chem. Phys.* **2000**, 113, 9901–9904) was employed for orthorhombic Na<sub>3</sub>HS. For these calculations,  $3 \times 3 \times 3$  or  $2 \times 2 \times 2$  charged supercells were used for cubic M<sub>3</sub>HCh and orthorhombic Na<sub>3</sub>HS, respectively. The Brillouin zones of the supercells were sampled with one  $k$ -point at (0.25 0.25 0.25). The criteria of convergence for electronic self-consistent cycle and structure optimization in NEB calculations were set to be  $1.0 \times 10^{-6}$  eV/supercell and  $2.0 \times 10^{-2}$  eV/Å, respectively. The total energies of the defect models calculated with the same condition were used to estimate the formation energies of Schottky and Frenkel defects.

## Section 2. Crystal structure analysis of $M_3HCh$ antiperovskites

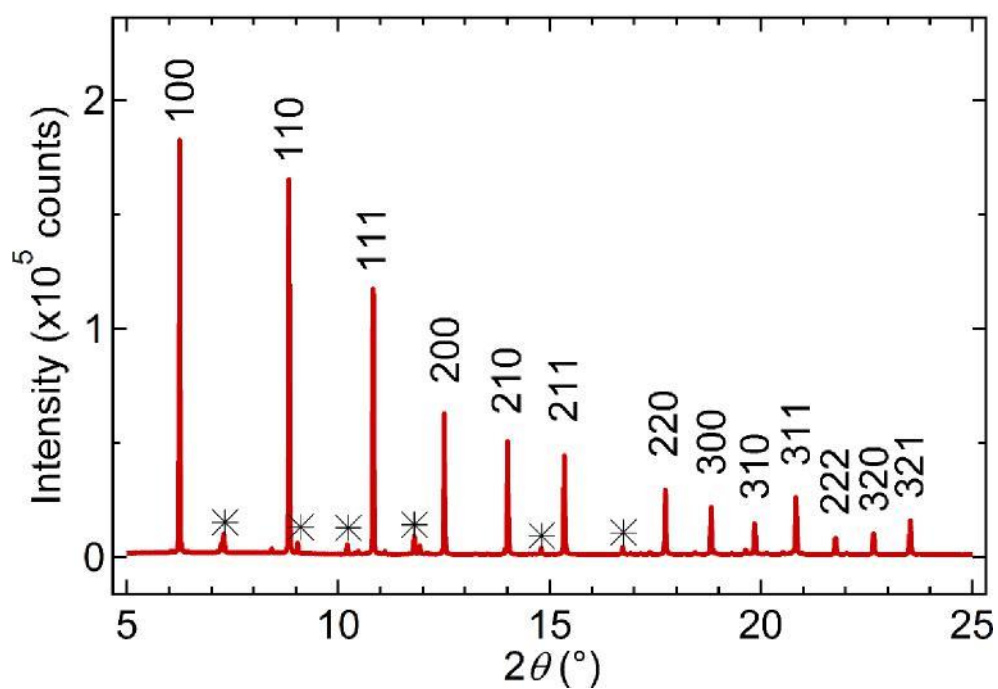

**Supplementary Figure 1** SXR D pattern of  $Li_3HS$  synthesized from a mixture of  $Li_2S$  and  $LiH$  (molar ratio of 1:3) at 5 GPa and 700 °C. The diffraction peaks are indexed in a cubic symmetry and labelled with the Miller indices of the lattice planes. Asterisks denote unreacted precursor impurities.

**Supplementary Table 1** Atomic coordinates, displacement parameters and occupancy factors for the cubic  $\bar{3}^2$  structure of Li<sub>3</sub>HS by SXR (upper)<sup>a</sup>/ND (lower).<sup>b</sup>

| Atom | Site | x   | y   | z   | $U_{ii}$ ( $100 \text{ \AA}^2$ )                                               | $g$       |
|------|------|-----|-----|-----|--------------------------------------------------------------------------------|-----------|
| Li   | 3d   | 0.5 | 0   | 0   | $U_{11} = 1.73(16)$<br>$U_{22} = 0.11(8)$<br>$U_{33} = 4.41(14)$<br>$3.79(10)$ | 0.98(7)/1 |
| S    | 1b   | 0.5 | 0.5 | 0.5 | $1.05(12)$<br>$0.43(4)$ $0.63^*$                                               | 1         |
| H    | 1a   | 0   | 0   | 0   | $1.61(5)$                                                                      | 1         |

<sup>a</sup>For SXR ( $\lambda = 0.41989 \text{ \AA}$ ) refinement using FULLPROF program,  $a = 3.85189(6) \text{ \AA}$ .  $R_{\text{Bragg}} = 4.28\%$  and  $R_f = 2.87\%$ , 78.1vol% Li<sub>3</sub>HS with the impurity of 0.3vol% Li<sub>2</sub>S, 17.7vol% LiH, and 3.9vol% BN.

<sup>b</sup>For ND refinement,  $a = 3.853354(17) \text{ \AA}$ ,  $R_{\text{wp}} = 1.35\%$  and  $R_{\text{Bragg}} = 6.28\%$ , weight fraction of 67.06%. Rietveld refinement assuming the anion exchange between A and B site ( $g_A = g_A(\text{S}) + g_A(\text{H})$ ,  $g_B = g_B(\text{S}) + g_B(\text{H})$ ,  $g_A(\text{H}) + g_B(\text{H}) = 1$ , and  $g_A(\text{S}) + g_B(\text{S}) = 1$ ) yield  $R_{\text{wp}} = 1.37\%$  and  $R_{\text{Bragg}} = 6.64\%$  with the occupancies of  $g_B(\text{H}) = 1.015(5)$  and  $g_A(\text{H}) = -0.015(5)$ .

\*The isotropic displacement parameter of H<sup>-</sup> was not refined for SXR.

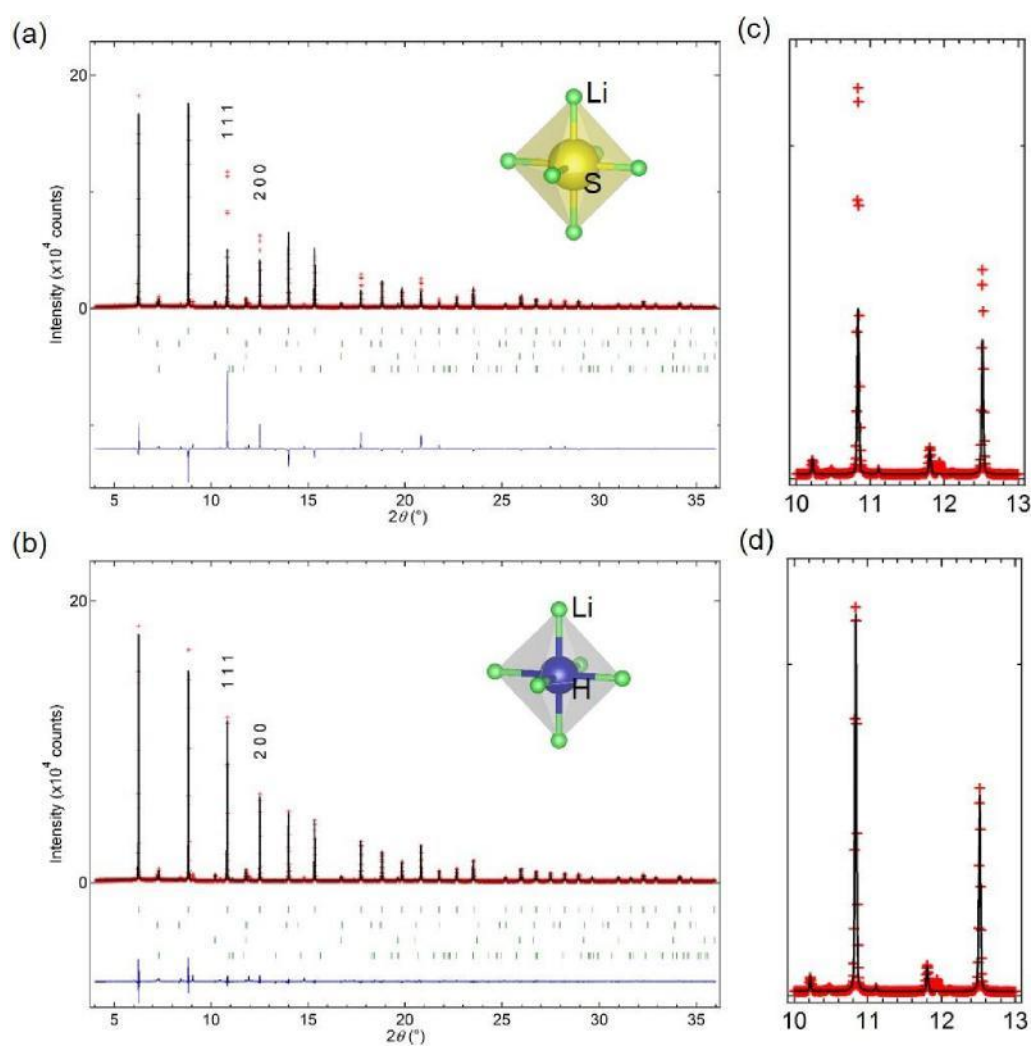

**Supplementary Figure 2** Rietveld refinement of SXRD data of  $\beta$   $\text{Li}_3\text{HS}$  using two different anion arrangements with  $\text{S}^{2-}$  centered in a Li octahedron (a, c) and  $\text{H}^-$  centered in a Li octahedron (b, d). The right panel of magnified reflections of 111 and 200 compares the intensities of the observed (red crosses) and calculated (black solid line) patterns under two proposed anion distributions. The red crosses, black solid line, the blue solid line, and green dashes denote the observed, calculated, difference intensities and calculated Bragg reflections (from top to bottom:  $\text{Li}_3\text{HS}$ ,  $\text{Li}_2\text{S}$ ,  $\text{LiH}$ , BN), respectively.

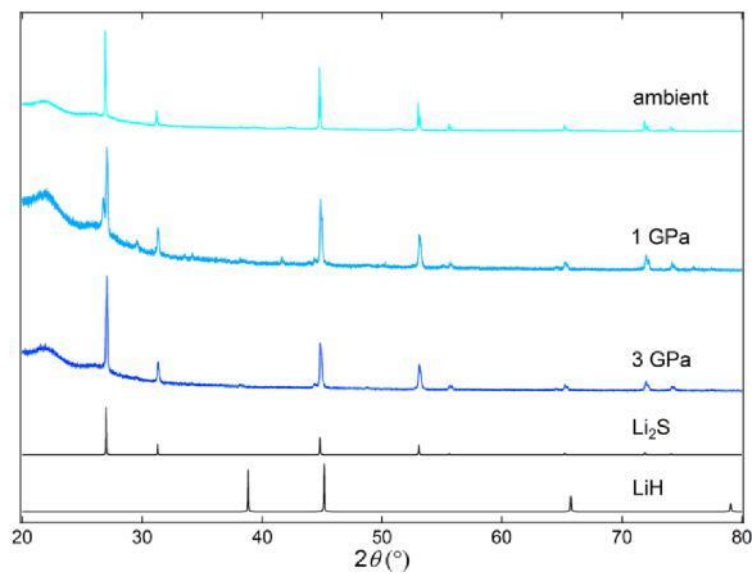

**Supplementary Figure 3** The diffraction patterns of obtained powders from reactions of mixtures of  $\text{Li}_2\text{S}$  and  $\text{LiH}$  under ambient pressure, 1 GPa and 3 GPa at 700 °C. The broad hump in the low-angle range originates from the Kapton tape used to cover the sample and in order to avoid the moisture and air contamination during the measurement.



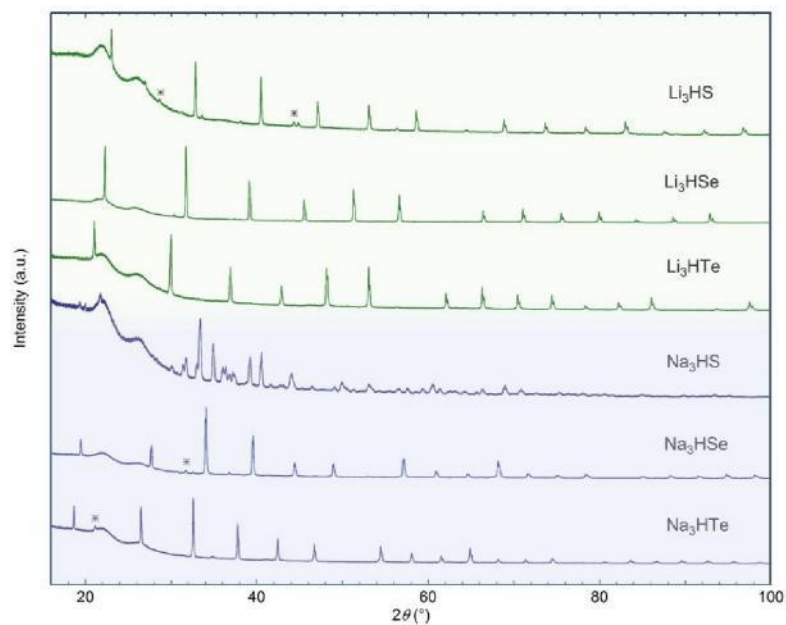

**Supplementary Figure 4** All the diffraction patterns of the new class of  $\text{M}_3\text{HCh}$  antiperovskites ( $\text{M} = \text{Li}, \text{Na}$ ;  $\text{Ch} = \text{S}, \text{Se}, \text{Te}$ ). All data were collected from a laboratory X-ray diffractometer with  $\text{Cu-K}\alpha$  radiation, where the broad hump in the low-angle range originates from the Kapton tape used to cover the sample powders to avoid the moisture and air contamination during the measurement. Asterisks denote a few minor impurity peaks.

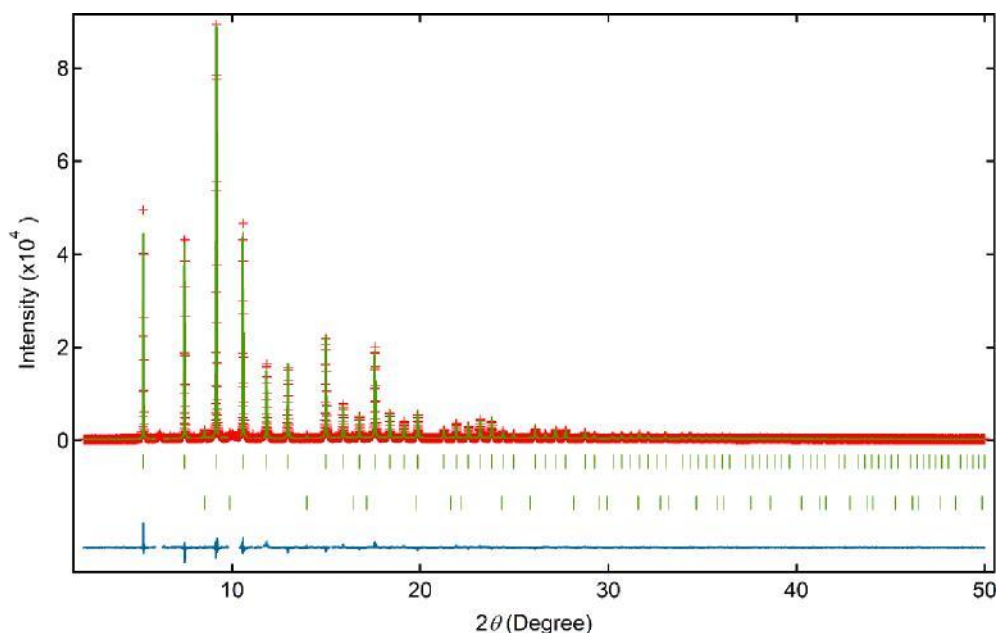

**Supplementary Figure 5** Rietveld refinement of SXR D ( $\lambda = 0.42043 \text{ \AA}$ ) pattern of  $\text{Na}_3\text{HSe}$ . The red crosses, green solid line, the blue solid line, and green dashes denote the observed, calculated, difference intensities and calculated Bragg reflections (from top to bottom:  $\text{Na}_3\text{HSe}$ ,  $\text{NaH}$ ), respectively. A few broad peaks of  $\text{Na}_2\text{Se}$  and unknown impurity can be observed in the following ranges and were excluded from the refinement:  $4.941\text{--}4.985^\circ$ ,  $5.947\text{--}6.313^\circ$ ,  $5.656\text{--}5.687^\circ$ ,  $6.681\text{--}6.741^\circ$ ,  $7.938\text{--}7.985^\circ$ ,  $9.322\text{--}9.385^\circ$ ,  $9.824\text{--}10.423^\circ$ ,  $10.363\text{--}10.41^\circ$ ,  $10.815\text{--}10.862^\circ$ ,  $11.062\text{--}11.138^\circ$ ,  $11.583\text{--}11.671^\circ$ ,  $15.239\text{--}15.286^\circ$ , and  $15.559\text{--}15.622^\circ$ .

**Supplementary Table 2** Atomic coordinates, displacement parameters and occupancy factors for the cubic  $\text{Na}_3\text{HSe}$  by SXR D<sub>a</sub>

| Atom | Site | x   | y   | z   | $U_{ii}$ ( $100 \text{ \AA}^2$ ) | $g$      |
|------|------|-----|-----|-----|----------------------------------|----------|
| Na   | 3d   | 0.5 | 0   | 0   | $U_{11} = 1.01(7)$               | 0.996(2) |
| Se   | 1b   | 0.5 | 0.5 | 0.5 | $1.708(12)$<br>$= 515(6)$        | 1        |
| H    | 1a   | 0   | 0   | 0   | 1*                               | 1        |

<sup>a</sup>Space group  $\mathcal{Fm}\bar{3}m$  (No. 221),  $a = 4.55901(7) \text{ \AA}$ .  $R_{\text{wp}} = 7.16\%$ ,  $\text{GOF} = 2.04$ ,  $R_{\text{Bragg}} = 4.99\%$  and  $R_{\text{f}} = 3.97\%$  for SXR D using JANA2006 program. Mass fractions are  $\text{Na}_3\text{HSe} = 96.3(3)\%$ ,  $\text{NaH} = 3.71(7)\%$ . Rietveld refinement assuming the anion exchange between A and B site ( $g_{\text{A}} = g_{\text{A}}(\text{Se}) + g_{\text{A}}(\text{H})$ ,  $g_{\text{B}} = g_{\text{B}}(\text{Se}) + g_{\text{B}}(\text{H})$ ,  $g_{\text{A}}(\text{H}) + g_{\text{B}}(\text{H}) = 1$ , and  $g_{\text{A}}(\text{Se}) + g_{\text{B}}(\text{Se}) = 1$ ) yielded  $R_{\text{wp}} = 6.60\%$  and  $R_{\text{Bragg}} = 2.80\%$  with the occupancies of  $g_{\text{A}}(\text{Se}) = 1.0236(7)$  and  $g_{\text{A}}(\text{H}) = -0.0236(7)$ . The refined composition is  $\text{Na}_{2.988(9)}\text{HSe}$ .

\*The isotropic displacement parameter is not refined.

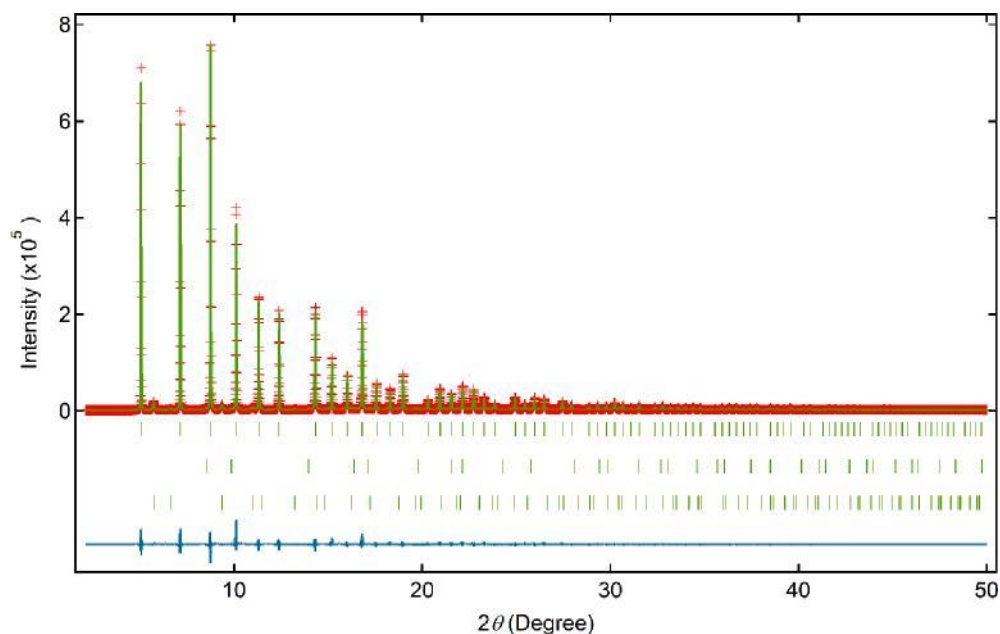

**Supplementary Figure 6** Rietveld refinement of SXR D ( $\lambda = 0.41989 \text{ \AA}$ ) pattern of  $\text{Na}_3\text{HTe}$ . The red crosses, green solid line, the blue solid line, and green dashes denote the observed, calculated, difference intensities and calculated Bragg reflections (from top to bottom:  $\text{Na}_3\text{HTe}$ ,  $\text{NaH}$ ,  $\text{Na}_2\text{Te}$ ), respectively.

**Supplementary Table 3** Atomic coordinates, displacement parameters and occupancy factors for the cubic  $\text{Na}_3\text{HTe}$  by SXR D<sup>a</sup>

| Atom | Site | x   | y   | z   | $U_{\text{iso}}$<br>$U_{ii} (100 \text{ \AA}^2)$ | $g$      |
|------|------|-----|-----|-----|--------------------------------------------------|----------|
| Na   | 3d   | 0.5 | 0   | 0   | $U_{11} = 1.65(9)$                               | 0.986(3) |
| Te   | 1b   | 0.5 | 0.5 | 0.5 | $1.551(9)$<br>$= 3/106$                          | 1        |
| H    | 1a   | 0   | 0   | 0   | 1*                                               | 1        |

<sup>a</sup>Space group  $\mathcal{Fm}\bar{3}m$  (No. 221),  $a = 4.76349(2) \text{ \AA}$ .  $R_{\text{wp}} = 7.72\%$ ,  $\text{GOP} = 6.38$ ,  $R_{\text{Bragg}} = 3.71\%$  and  $R_f = 2.53\%$  for SXR D using JANA2006 program. Mass fractions are  $\text{Na}_3\text{HTe} = 95.3(3)\%$ ,  $\text{NaH} = 1.3198(3)\%$ ,  $\text{Na}_2\text{Te} = 3.37(3)\%$ . Rietveld refinement assuming the anion exchange between  $A$  and  $B$  site ( $g_A = g_A(\text{Te}) + g_A(\text{H})$ ,  $g_B = g_B(\text{Te}) + g_B(\text{H})$ ,  $g_A(\text{H}) + g_B(\text{H}) = 1$ , and  $g_A(\text{Te}) + g_B(\text{Te}) = 1$ ) yielded  $R_{\text{wp}} = 7.68\%$  with the occupancies of  $g_A(\text{Te}) = 0.9828(6)$  and  $g_A(\text{H}) = 0.0172(6)$ . The refined composition is  $\text{Na}_{2.958(9)}\text{HTe}$ .

\*The isotropic displacement parameter is not refined.

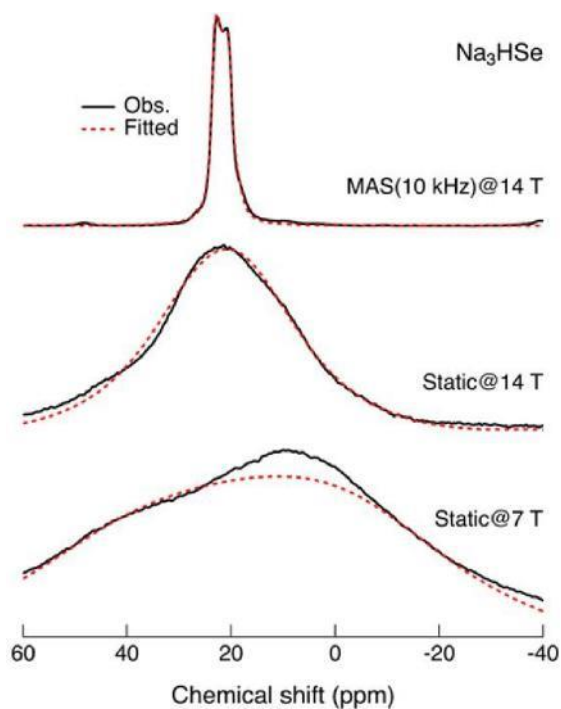

**Supplementary Figure 7** Magnetic field dependence of  $^{23}\text{Na}$  NMR spectra of  $\text{Na}_3\text{HSe}$  at room temperature (from bottom to top, under a magnetic field of 7 T, 14 T, and 14 T with magic-angle spinning at 10 kHz). All the three spectra were fitted as a 2<sup>nd</sup>-order quadrupolar line shape with a common set of  $C_Q = 1.61$  MHz and  $\eta = 0.04$ , where  $C_Q$ , and  $\eta$  denote a quadrupole coupling constant and an asymmetry parameter, respectively.

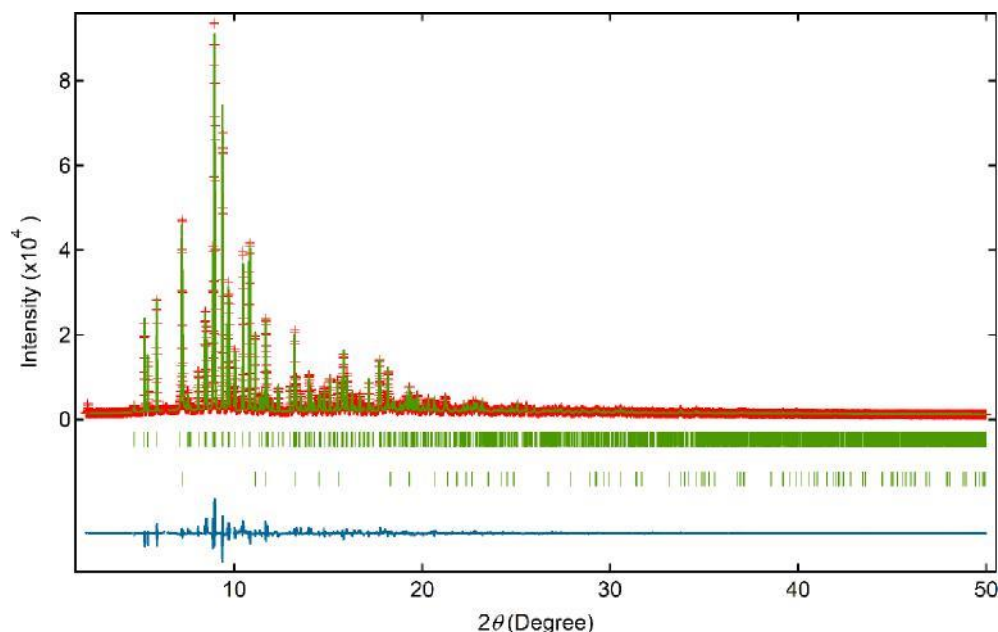

**Supplementary Figure 8** Rietveld refinement of SXR D ( $\lambda = 0.41989 \text{ \AA}$ ) pattern of  $\text{Na}_3\text{HS}$ . The red crosses, green solid line, the blue solid line, and green dashes denote the observed, calculated, difference intensities and calculated Bragg reflections (from top to bottom:  $\text{Na}_3\text{HS}$ , h-BN), respectively. The following ranges were excluded from the refinement:  $2.168\text{--}2.264^\circ$ ,  $4.573\text{--}4.659^\circ$ ,  $6.167\text{--}6.227^\circ$ ,  $6.298\text{--}6.441^\circ$ ,  $9.806\text{--}9.996^\circ$ ,  $16.927\text{--}17.01^\circ$ , and  $50\text{--}71.439^\circ$

**Supplementary Table 4** Atomic coordinates, displacement parameters and occupancy factors for the orthorhombic  $\text{Na}_3\text{HS}$  by SXR D<sub>a</sub>

| Atom | Site | x           | y          | z           | $U_{ii}$ ( $100 \text{ \AA}^2$ )                                | $g$ |
|------|------|-------------|------------|-------------|-----------------------------------------------------------------|-----|
| Na1  | 4c   | 0.0331(2)   | 0.25       | 0.5932(2)   | $U_{11} = 1.84(11)$                                             | 1   |
| Na2  | 8d   | 0.19451(15) | 0.04941(8) | 0.19206(16) | $U_{11} = 2.81(8)$<br>$U_{22} = 1.77(10)$                       | 1   |
| S    | 4c   | 0.43047(15) | 0.25       | 0.48481(16) | $U_{33} = 2.33(12)$                                             | 1   |
| H    | 4b   | 0.5         | 0.5        | 0           | $U_{33} = 2.33(12)$<br>$U_{13} = 0.34(7)$<br>$U_{23} = 0.81(6)$ | 1   |

<sup>a</sup>Space group (No. 62),  $a = 6.76037(9) \text{ \AA}$ ,  $b = 8.89761(10) \text{ \AA}$ ,  $c = 6.8659(8) \text{ \AA}$ .  $R_{\text{wp}} = 6.13\%$ ,  $\text{GOF} = 3.09$ ,  $R_{\text{Bragg}} = 1.58\%$  and  $K_f = 5.99\%$  for SXR D using JANA2006 program. The h-BN peaks were refined using Le Bail analysis. When the occupancies of the Na1 and Na2

site were refined a composition of  $\text{Na}_{3.129(9)}\text{HS}$  was obtained with  $R_{\text{wp}} = 6.02\%$ ,  $g(\text{Na1}) = 1.039(3)$  and  $g(\text{Na2}) = 1.045(3)$ . Rietveld refinement assuming the anion exchange between A and B site ( $g_A = g_A(\text{S}) + g_A(\text{H})$ ,  $g_B = g_B(\text{S}) + g_B(\text{H})$ ,  $g_A(\text{H}) + g_B(\text{H}) = 1$ , and  $g_A(\text{S}) + g_B(\text{S}) = 1$ ) yielded  $R_{\text{wp}} = 5.93\%$  and  $R_{\text{Bragg}} = 7.07\%$  with the occupancies of  $g_A(\text{S}) = 0.9781(10)$  and  $g_A(\text{H}) = 0.0219(10)$

The isotropic displacement parameter is not refined.

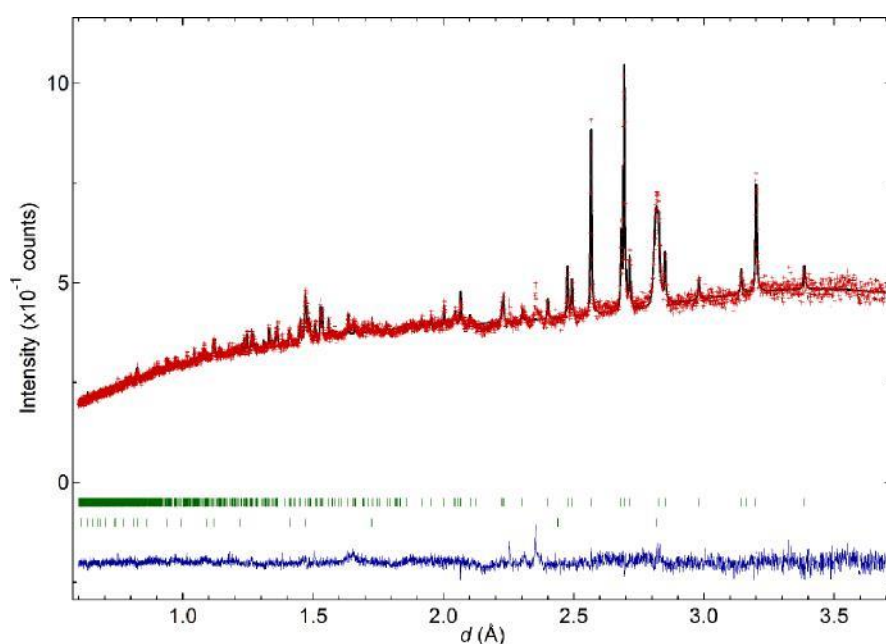

**Supplementary Figure 9** Rietveld refinement of PND pattern of Na<sub>3</sub>HS. The red crosses, black solid line, the blue solid line, and green dashes denote the observed, calculated, difference intensities and calculated Bragg reflections (from top to bottom: Na<sub>3</sub>HS, NaH), respectively.

**Supplementary Table 5** Atomic coordinates, displacement parameters and occupancy factors for the orthorhombic Na<sub>3</sub>HS by PND<sup>a</sup>

| Atom | Site | x          | y          | z           | $U_{ii}$ ( $100 \text{ \AA}^2$ )                               | $g$ |
|------|------|------------|------------|-------------|----------------------------------------------------------------|-----|
| Na1  | 4c   | 0.03795(9) | 0.25       | 0.59096(9)  | $U_{11} = 1.90(4)$                                             | 1   |
| Na2  | 8d   | 0.19253(5) | 0.04994(5) | 0.1906(6)   | $U_{11} = 1.68(4)$<br>$U_{22} = 2.27(4)$<br>$U_{33} = 1.50(2)$ | 1   |
| S    | 4c   | 0.42885(9) | 0.25       | 0.48863(11) | $U_{11} = 2.34(4)$<br>$U_{22} = 3.26(5)$<br>$U_{33} = 3.26(5)$ | 1   |
| H    | 4b   | 0.5        | 0.5        | 0           | $U_{11} = 3.26(5)$<br>$U_{22} = 3.26(5)$<br>$U_{33} = 3.26(5)$ | 1   |

<sup>a</sup>Space group (No. 62),  $a = 6.77242(12) \text{ \AA}$ ,  $b = 8.89811(2) \text{ \AA}$ ,  $c = 6.28671(12) \text{ \AA}$ .  
 $R_{wp} = 2.53\%$  and  $R_{Bragg} = 24.30\%$ , weight fraction = 89.72% for PND using Z-Rietveld program.

### Section 3. Size-flexibility of hydride anion

**Supplementary Table 6** Information of  $M_3HCh$  ( $M = Li, Na; Ch = S, Se, Te$ ).

| Composition         | Space group | Lattice parameters (Å)                              | Ionic radius (ppm) <sup>a</sup> |     | <sup>tb</sup><br>$t'$                  | $Ch^{2-}$ BVS <sup>e</sup> |
|---------------------|-------------|-----------------------------------------------------|---------------------------------|-----|----------------------------------------|----------------------------|
| Li <sub>3</sub> HS  | Pm3 m       | a = 3.85189(6)                                      | Li                              | 76  | 0.85 <sup>c</sup><br>0.95 <sup>d</sup> | -1.44                      |
|                     |             |                                                     | S                               | 184 |                                        |                            |
|                     |             |                                                     | H                               | 140 |                                        |                            |
| Li <sub>3</sub> HSe | Pm3 m       | a = 3.9744(5)                                       | Li                              | 76  | 0.90<br>0.98                           | -1.72                      |
|                     |             |                                                     | Se                              | 198 |                                        |                            |
|                     |             |                                                     | H                               | 140 |                                        |                            |
| Li <sub>3</sub> HTe | Pm3 m       | a = 4.2221(3)                                       | Li                              | 76  | 0.97<br>0.99                           | -1.87                      |
|                     |             |                                                     | Te                              | 221 |                                        |                            |
|                     |             |                                                     | H                               | 140 |                                        |                            |
| Na <sub>3</sub> HS  | Pnma        | a = 6.76037(9)<br>b = 8.89761(10)<br>c = 6.28659(8) | Na                              | 102 | 0.84<br>0.85                           | -1.60                      |
|                     |             |                                                     | S                               | 184 |                                        |                            |
|                     |             |                                                     | H                               | 140 |                                        |                            |
| Na <sub>3</sub> HSe | Pm3 m       | a = 4.55901(7)                                      | Na                              | 102 | 0.88<br>0.93                           | -1.32                      |
|                     |             |                                                     | Se                              | 198 |                                        |                            |
|                     |             |                                                     | H                               | 140 |                                        |                            |
| Na <sub>3</sub> HTe | Pm3 m       | a = 4.76349(2)                                      | Na                              | 102 | 0.94<br>0.96                           | -1.67                      |
|                     |             |                                                     | Te                              | 221 |                                        |                            |
|                     |             |                                                     | H                               | 140 |                                        |                            |

<sup>a</sup>The ionic radii for  $r_{ch}$ ,  $r_M$  are referred as revised effective Shannon ionic radii (Shannon, R. D. *Acta Cryst.* **1976**, 32, 751). It should be noted that Shannon ionic radius of  $r_{ch}$  for coordination number (CN) six was used as a rough estimation, though the CN of Ch in  $M_3HCh$  antiperovskites is twelve. The value of  $r_H = 140$  pm is employed in many oxides and pure hydrides (Messer C. E. *J. Solid State Chem.* **1970**, 2, 144).

<sup>b</sup>The Goldschmidt tolerance factor of  $M_3HCh$  ( $M = Li, Na; Ch = S, Se, Te$ ) is defined by the equation  $t = (r_{ch} + r_M) / [\sqrt{2}(r_H + r_M)]$ , where  $r_{ch}$ ,  $r_M$  and  $r_H$  are the ionic radius of chalcogenide, alkali and hydride ion, respectively.

<sup>c</sup>The switching anion configuration from Li<sub>3</sub>HS (HLi<sub>6</sub> octahedra) to Li<sub>3</sub>SH (SLi<sub>6</sub> octahedra) led to a very low  $t$  value of 0.59. By comparison with  $t$  value of Li<sub>3</sub>HS (0.85), the smaller  $t$  indicates the higher instability and a tendency to decomposition.

<sup>d</sup>The refined tolerance factor ( $t'$ ) for  $M_3HCh$  using the observed ionic radius of hydride.

<sup>e</sup>We calculated bond valence sum (BVS) parameters of  $Ch^{2-}$  based on the reported Ch-Li/Na according to the reference (Brese, N. E.; O'Keeffe, M. *Acta Cryst.* **1991**, 47, 192).

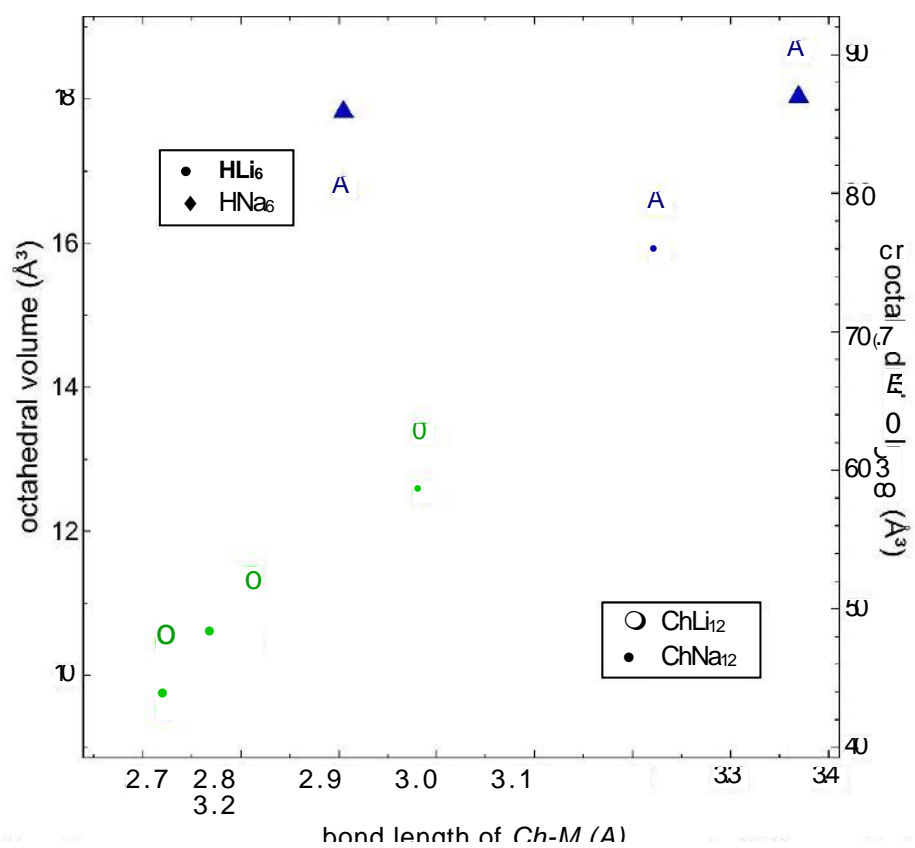

**Supplementary Figure 10** The volume change of HM<sub>6</sub> octahedra and ChM<sub>12</sub> cuboctahedra in the M<sub>3</sub>HCh antiperovskites



**Supplementary Table 7** Bader radius of M<sup>+</sup>, H<sup>-</sup> and Ch<sup>2-</sup> ions in M<sub>3</sub>HCh compounds (M = Li, Na; Ch = S, Se, Te) under the pressure of 0 and 5 GPa.

|                      | Pressure<br>(GPa) | Bader Atomic Radius (Å) |       |       | Normalized Bader Atomic Radius |       |       |
|----------------------|-------------------|-------------------------|-------|-------|--------------------------------|-------|-------|
|                      |                   | M                       | H     | Ch    | M                              | H     | Ch    |
| Li <sub>3</sub> HS   | 0                 | 0.938                   | 1.377 | 1.968 | 1.000                          | 1.000 | 1.000 |
|                      | 5                 | 0.920                   | 1.326 | 1.908 | 0.980                          | 0.963 | 0.970 |
| Li <sub>3</sub> HSe  | 0                 | 0.952                   | 1.421 | 2.057 | 1.000                          | 1.000 | 1.000 |
|                      | 5                 | 0.931                   | 1.362 | 1.991 | 0.978                          | 0.958 | 0.968 |
| Li <sub>3</sub> HTe  | 0                 | 0.972                   | 1.482 | 2.223 | 1.000                          | 1.000 | 1.000 |
|                      | 5                 | 0.948                   | 1.415 | 2.142 | 0.975                          | 0.955 | 0.963 |
| c-Na <sub>3</sub> HS | 0                 | 1.322                   | 1.477 | 2.151 | 1.000                          | 1.000 | 1.000 |
|                      | 5                 | 1.281                   | 1.388 | 2.060 | 0.969                          | 0.940 | 0.958 |
| Na <sub>3</sub> HSe  | 0                 | 1.332                   | 1.515 | 2.235 | 1.000                          | 1.000 | 1.000 |
|                      | 5                 | 1.288                   | 1.428 | 2.132 | 0.967                          | 0.943 | 0.954 |
| Na <sub>3</sub> HTe  | 0                 | 1.350                   | 1.574 | 2.386 | 1.000                          | 1.000 | 1.000 |
|                      | 5                 | 1.300                   | 1.479 | 2.269 | 0.963                          | 0.939 | 0.951 |

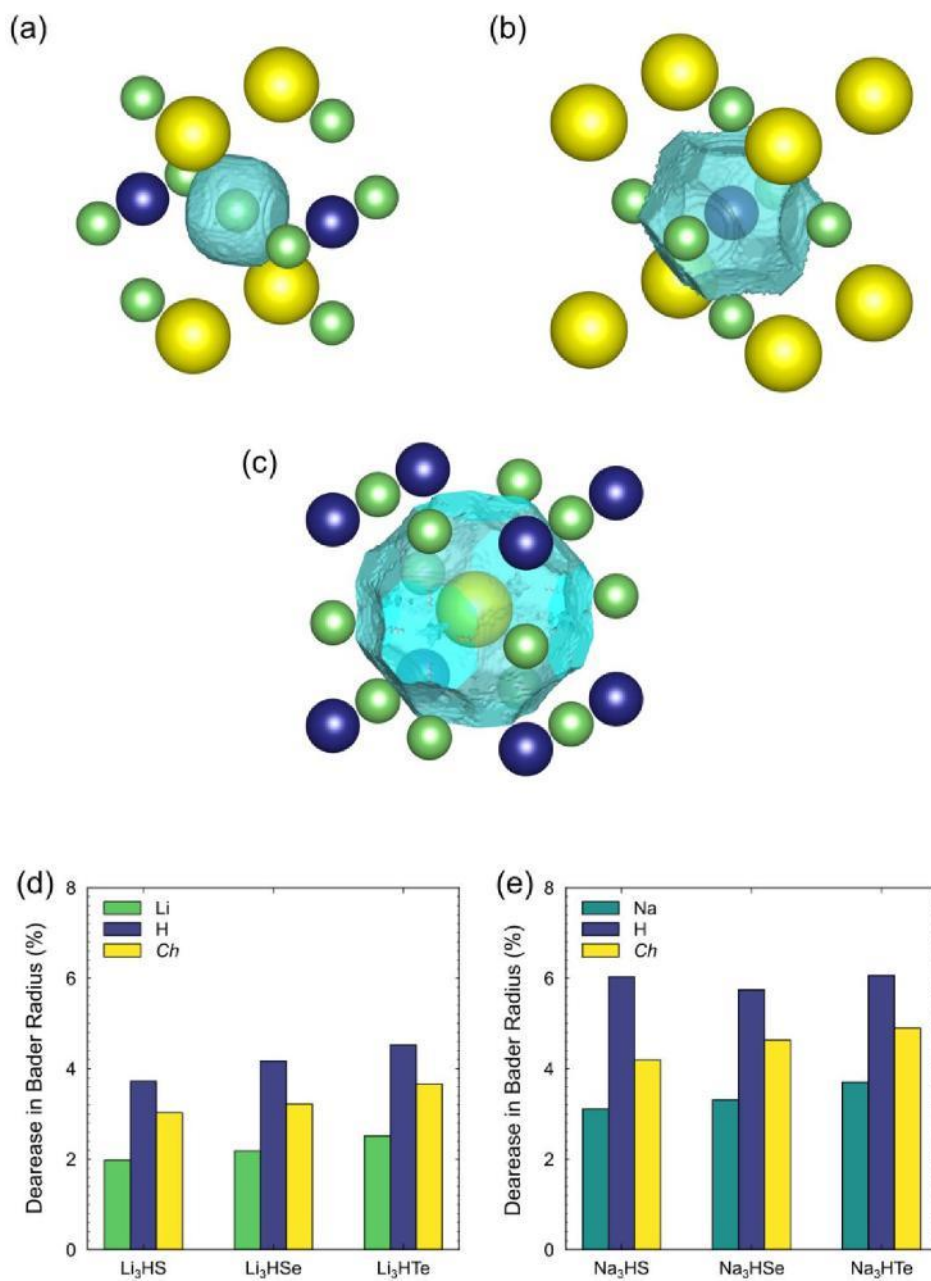

**Supplementary Figure 11** Bader region (light blue) of each ion (a)  $\text{Li}^+$  (green), (b)  $\text{H}^-$  (blue) and (c)  $\text{S}^{2-}$  (yellow) in  $\text{Li}_3\text{HS}$ . Decrease percentage of Bader radius of each ion in (d)  $\text{Li}_3\text{HCh}$  and (e)  $\text{Na}_3\text{HCh}$  under the pressure of 5 GPa.

## Section 4. Ambient synthesis of Na<sub>3</sub>HTe

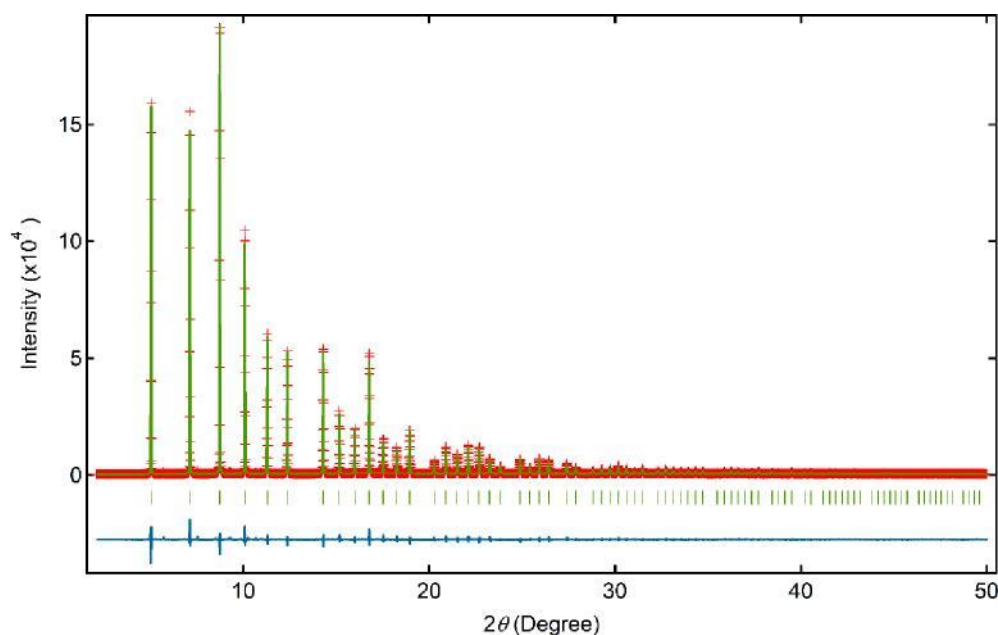

**Supplementary Figure 12** Rietveld refinement of SXR D ( $\lambda = 0.41943 \text{ \AA}$ ) pattern of Na<sub>3</sub>HTe obtained at ambient pressure. Na<sub>2</sub>Te (Kojundo, 99%) was mixed with NaH (Sigma-Aldrich, 99%) in a 1:2 molar ratio, sealed in an evacuated pyrex tube, and heat at 400 °C for 12 h. The red crosses, green solid line, the blue solid line, and green dashes denotes the observed, calculated, difference intensities and calculated Bragg reflections, respectively. The refinement was performed between 2° and 50°.

**Supplementary Table 8** Atomic coordinates, displacement parameters and occupancy factors for Na<sub>3</sub>HTe ambient phase by SXR D<sub>a</sub>

| Atom | Site | x   | y   | z   | $U_{ii}$ ( $100 \text{ \AA}^2$ )                  | $g$      |
|------|------|-----|-----|-----|---------------------------------------------------|----------|
| Na   | 3d   | 0.5 | 0   | 0   | $U_{11} = 1.95(8)$<br>$U_{22} = U_{33} = 3.18(6)$ | 0.987(3) |
| Te   | 1b   | 0.5 | 0.5 | 0.5 | 1.622(5)                                          | 1        |
| H    | 1a   | 0   | 0   | 0   | 1*                                                | 1        |

<sup>a</sup>Space group  $\mathcal{F}d\bar{3}m$  (No. 221),  $a = 4.76717(5) \text{ \AA}$ .  $R_{wp} = 7.07\%$ ,  $GOP = 2.69$ ,  $R_{Bragg} = 1.14\%$  and  $R_f = 0.63\%$  for SXR D using JANA2006 program. Rietveld refinement assuming the anion exchange between A and B site ( $g_A = g_A(\text{Te}) + g_A(\text{H})$ ,  $g_B = g_B(\text{Te}) + g_B(\text{H})$ ,  $g_A(\text{H}) + g_B(\text{H}) = 1$ , and  $g_A(\text{Te}) + g_B(\text{Te}) = 1$ ) yielded  $R_{wp} = 7.05\%$  with the occupancy of  $g_A(\text{Te}) = 1.0042(5)$  and  $g_A(\text{H}) = -0.0042(5)$ . The refined composition is Na<sub>2.961(9)</sub>HTe.

\*The isotropic displacement parameter is not refined.

## Section 5. Electronic band structures at 0 GPa

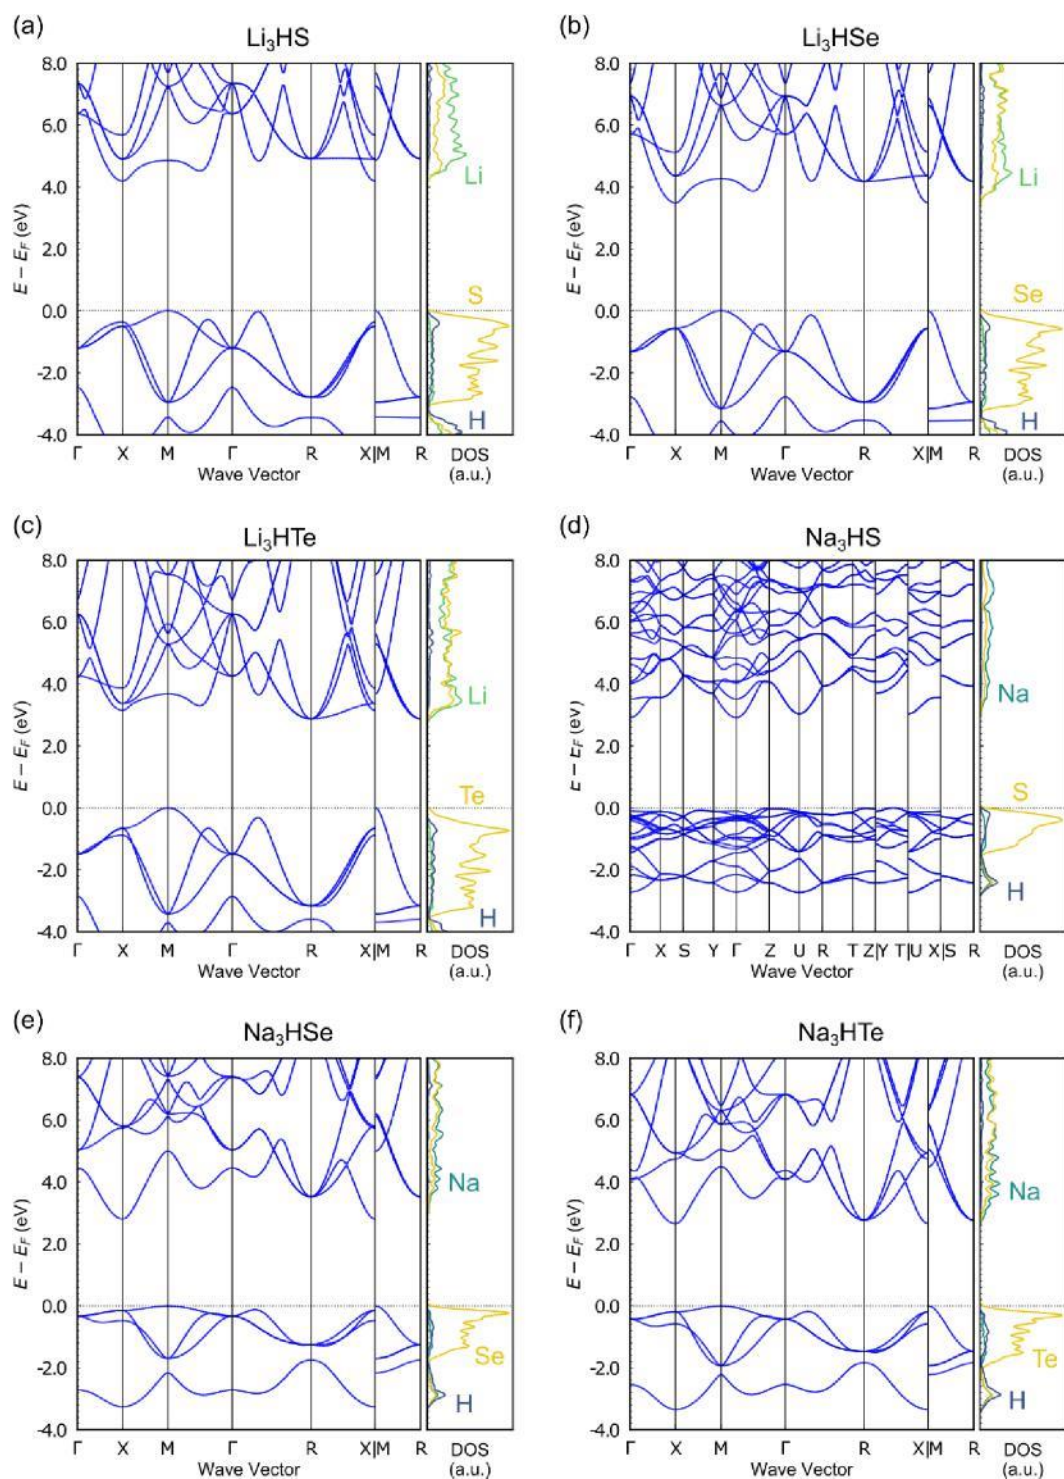

**Supplementary Figure 13** Electronic band structures and partial electronic density of states (DOS) of (a)  $\text{Li}_3\text{HS}$ , (b)  $\text{Li}_3\text{HSe}$ , (c)  $\text{Li}_3\text{HTe}$ , (d)  $\text{o-Na}_3\text{HS}$ , (e)  $\text{Na}_3\text{HSe}$ , and (f)  $\text{Na}_3\text{HTe}$  under 0 GPa. All plots are normalized by Fermi level,  $E_F$ .

## Section 6. Phonon band structures at 0 and 5 GPa

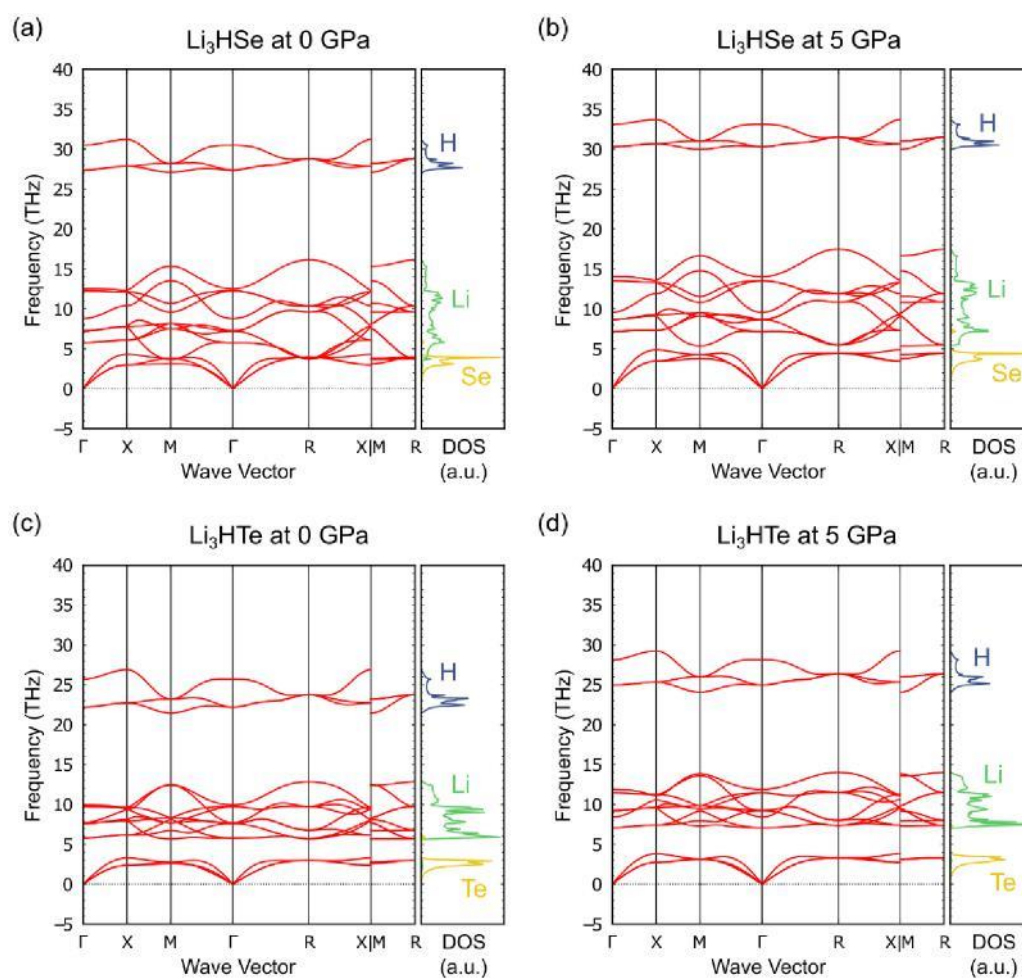

**Supplementary Figure 14** Phonon band structures and partial phonon density of states (DOS) of M, H and Ch ions under 0 and 5 GPa. (a,b)  $\text{Li}_3\text{HSe}$ , (c,d)  $\text{Li}_3\text{HTe}$ . Negative number of vertical axis represents imaginary frequency.

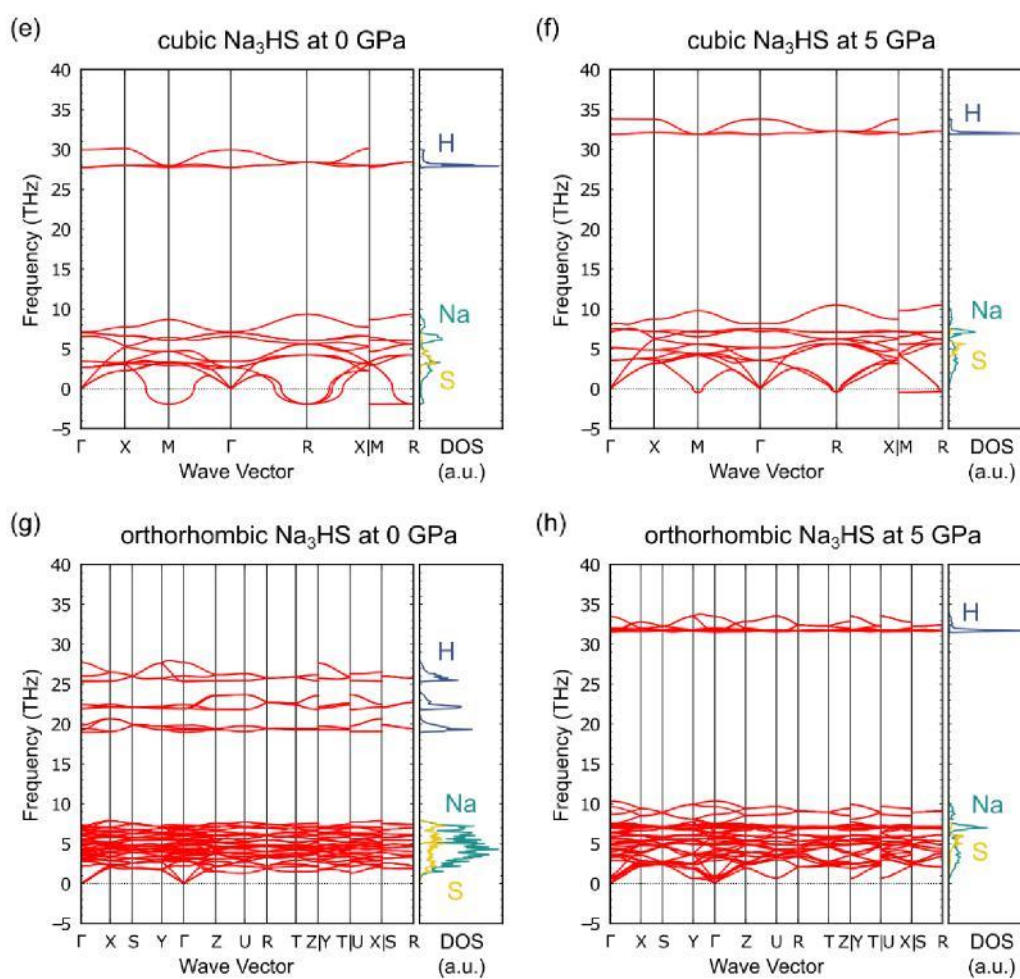

**Supplementary Figure 14** (Continued) Phonon band structures and partial phonon density of states (DOS) of M, H and Ch ions under 0 and 5 GPa. (e,f) hypothetical c- $\text{Na}_3\text{HS}$ , (g,h) o- $\text{Na}_3\text{HS}$ . Phonon DOS of o- $\text{Na}_3\text{HS}$  under 5 GPa are similar with that of c- $\text{Na}_3\text{HS}$  because its crystal structure becomes closer to the cubic form due to the application of pressure. Negative number of vertical axis represents imaginary frequency.

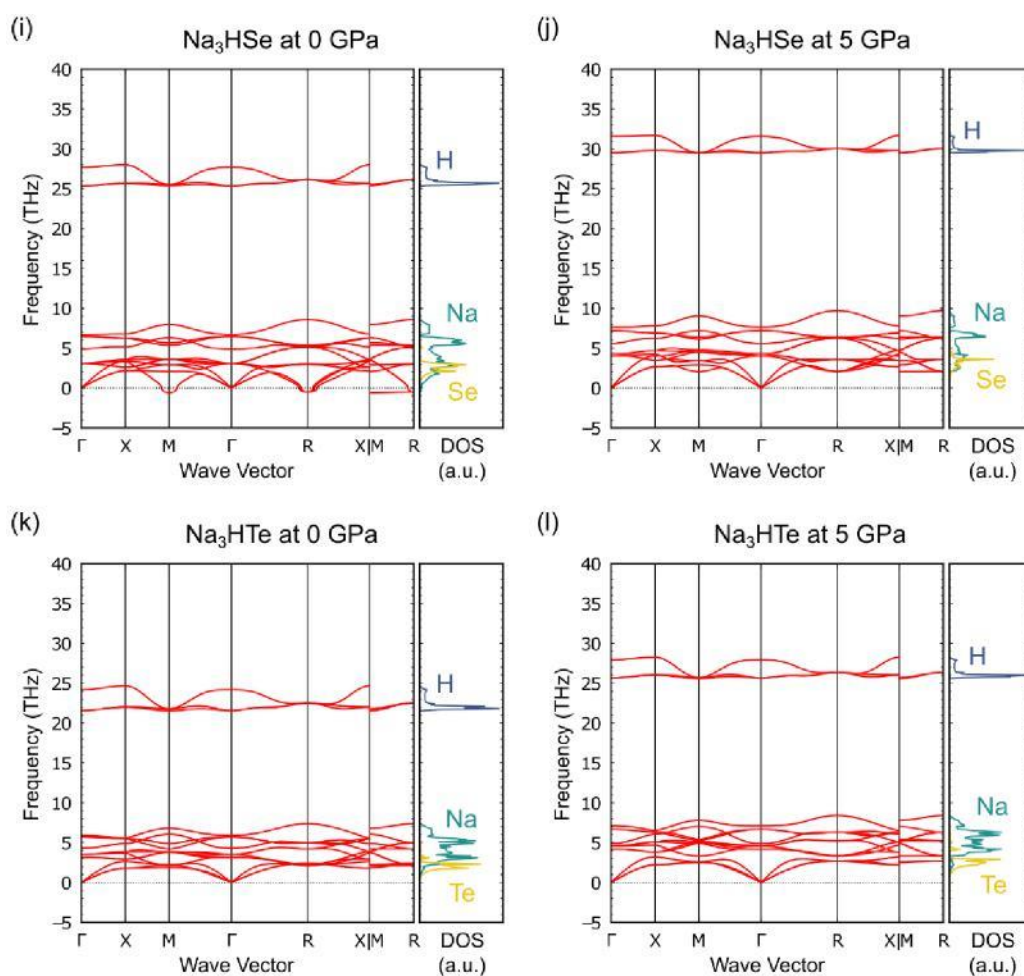

**Supplementary Figure 14** (Continued) Phonon band structures and partial phonon density of states (DOS) of M, H and Ch ions under 0 and 5 GPa. (i,j)  $\text{Na}_3\text{HSe}$  and (k,l)  $\text{Na}_3\text{HTe}$ . Negative number of vertical axis represents imaginary frequency.

## Section 7. Na<sup>+</sup> migration pathways in orthorhombic Na<sub>3</sub>HS

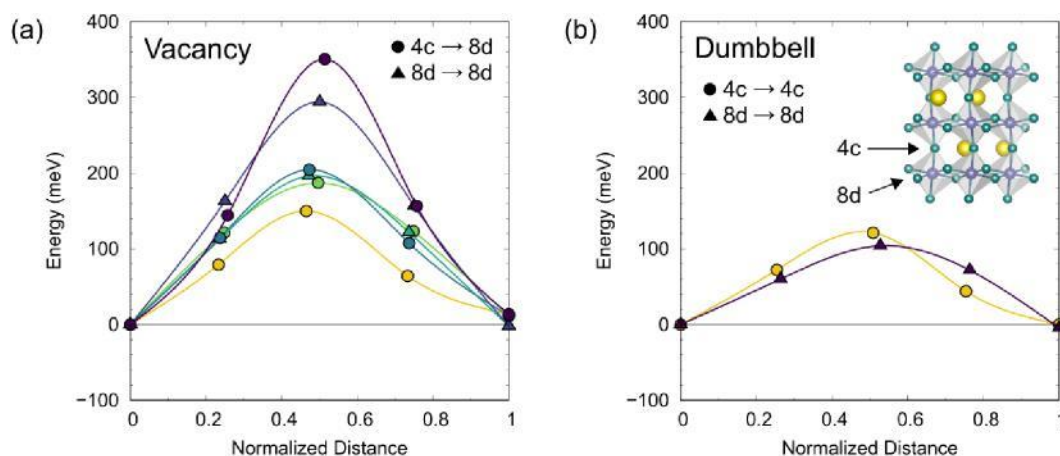

**Supplementary Figure 15** Calculated energy migration pathways in orthorhombic Na<sub>3</sub>HS via (a) vacancy and (b) interstitial-dumbbell mechanism. The inset in (b) shows Wyckoff positions of Na ions with the crystal structure where light-green, blue and yellow balls represent Na<sup>+</sup>, H<sup>-</sup>, and S<sup>2-</sup> ions, respectively. There are six migration pathways for the vacancy mechanism, and the pathway depicted in yellow is displayed in Figure 5 in the main text. The formation energy of Na<sup>+</sup> vacancy at the 4c site is slightly lower than that of the 8d site by roughly 10 meV. We found only two migration pathways by the dumbbell mechanism, namely from 4c to 4c and from 8d to 8d sites, since most of interstitial models that we constructed were not stable and did not fall into local energy minima. The pathway from 4c to 4c sites is displayed in Figure 5; although the energy is slightly higher than that from 8d to 8d sites, the formation energy of Na<sup>+</sup> interstitial at the 8d site is more stable than that at the 4c site by roughly 170 meV.



## Section 8. The migration barriers and defect formation energies in $M_3HCh$

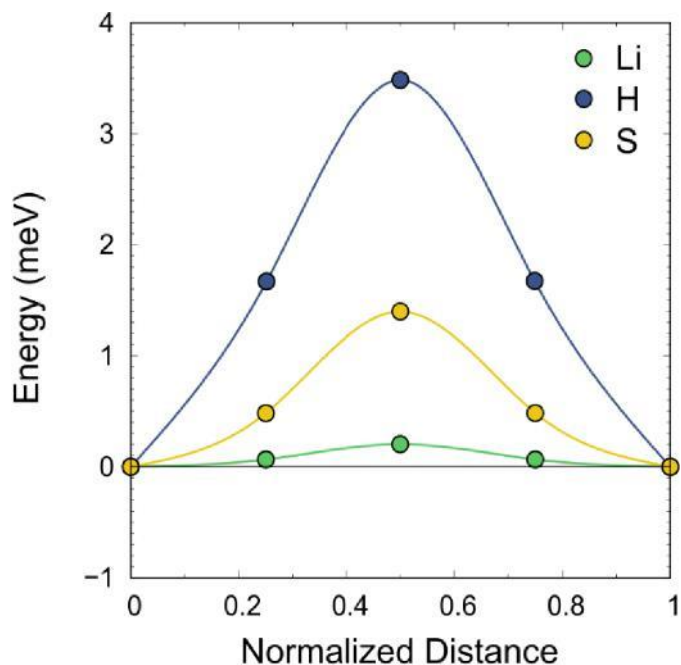

**Supplementary Figure 16** Migration energy barriers via vacancy mechanism in  $Li_3HS$ .

The calculated migration barrier is  $\sim 0.20$  eV for  $Li^+$ ,  $\sim 3.49$  eV for  $H^-$  and  $\sim 1.40$  eV for  $S^{2-}$ .

**Supplementary Table 9** Formation energies of Schottky and Frenkel defects. The

possible charge carriers include MH Schottky defects with a M-vacancy ( $V_M'$ ) and H-vacancy ( $V_H'$ ),  $M_2Te$  Schottky defects with two  $V_M'$  and one Ch-vacancy ( $V_{Ch}$

$\cdot\cdot$ ). Charge-neutral M/M-vacancy Frenkel defect pair is expressed by  $V_M' + M_i$  with the Kröger-Vink notations. For o- $Na_3HS$ , the energies of the most stable vacancy and interstitial were used for the calculation. Energies are in eV per defect.

| Compound  | $V_M' + V_H'$ | $2V_M' + V_{Ch}$ | $V_M' + M_i$ |
|-----------|---------------|------------------|--------------|
| $Li_3HS$  | 0.707         | 0.653            | 0.862        |
| $Li_3HSe$ | 0.693         | 0.760            | 1.016        |
| $Li_3HTe$ | 0.542         | 0.855            | 1.069        |
| $Na_3HS$  | 0.667         | 0.866            | 0.893        |
| $Na_3HSe$ | 0.647         | 0.570            | 0.804        |
| $Na_3HTe$ | 0.672         | 0.767            | 1.061        |

## Section 9. Ionic diffusion

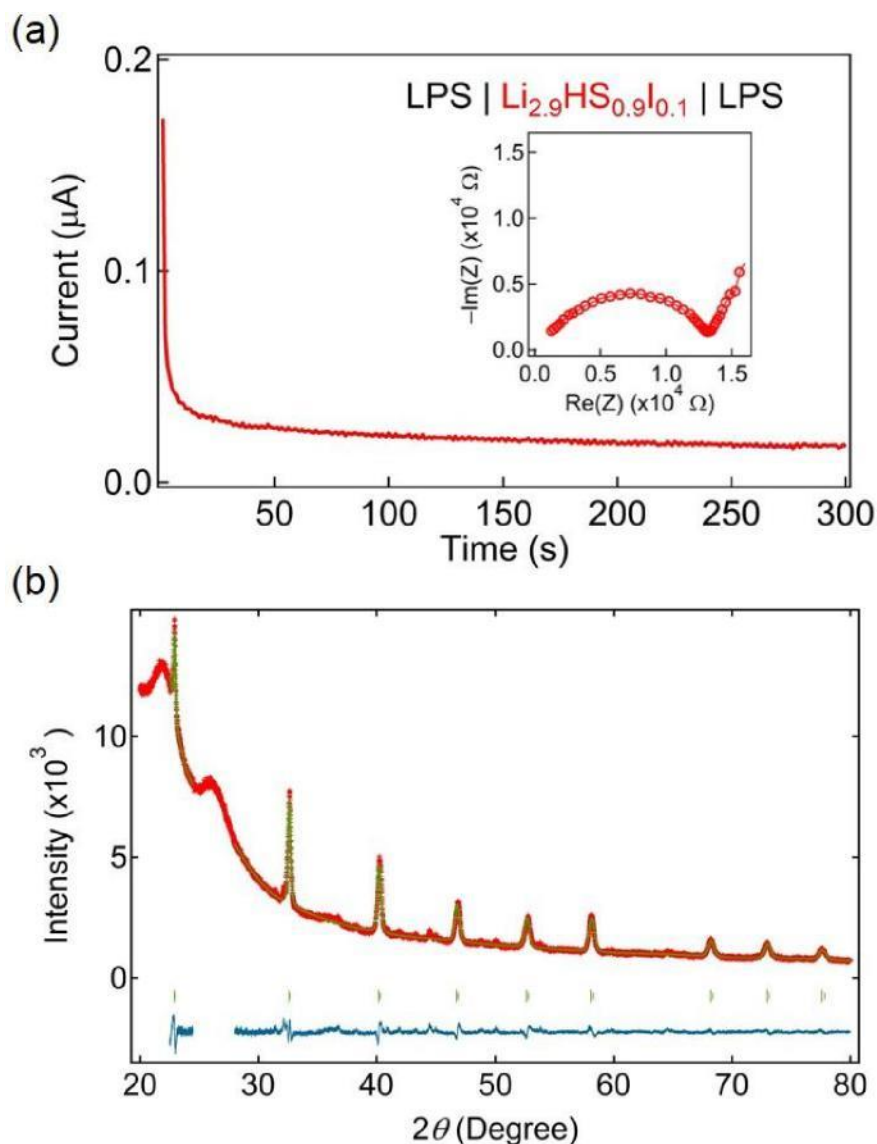

**Supplementary Figure 17** (a) The results of potentiostatic measurement of the symmetric cell  $\text{Li}_3\text{PS}_4/\text{Li}_{3-x}\text{H}(\text{S}_{1-x}\text{I}_x)/\text{Li}_3\text{PS}_4$ , where  $\text{Li}_3\text{PS}_4$  is a well-known Li-ion conductor and synthesized by mechanical milling according to the reference (Hayashi, A., Hama, S., Morimoto, H., *et al.* *J. Am. Ceram. Soc.* **2001**, 84, 477-479). The steady current is observed when a DC voltage of 0.5 V is applied at room temperature. Inset shows the Nyquist plot of the cell  $\text{Li}_3\text{PS}_4/\text{Li}_{2.9}\text{H}(\text{S}_{0.9}\text{I}_{0.1})/\text{Li}_3\text{PS}_4$  before the potentiostatic measurement. (b) Le bail analysis of Cu-K $\alpha$  XRD pattern of iodine doped  $\text{Li}_{2.9}\text{H}(\text{S}_{0.9}\text{I}_{0.1})$  yielded a cubic phase with  $a = 3.89205(12)$  Å,  $R_{\text{wp}} = 3.85\%$ ,  $\text{GOF} = 1.64$ . The red crosses, green solid line, the blue solid line, and green dashes denotes the observed, calculated, difference intensities and calculated Bragg reflections, respectively. The following ranges were excluded from the refinement:  $5.0\text{--}22.5^\circ$  and  $24.5\text{--}28.0^\circ$ .

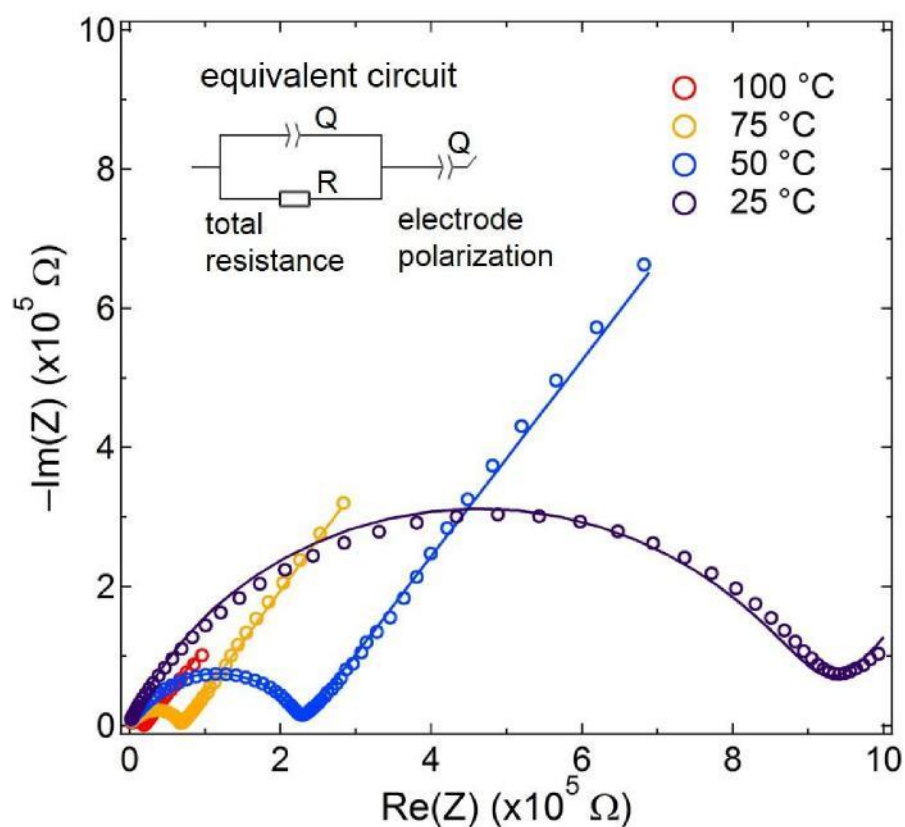

**Supplementary Figure 18** Nyquist plots (open circles denote raw data; solid lines denote fitting curves) of cold-pressed Na<sub>3</sub>HSe pellet in the temperature range of 25 °C to 100 °C. The spectra were fit with an equivalent circuit consisting of a serial connection of one parallel arrangements of a resistor (R) and a constant phase element (CPE, Q) and an additional CPE component for electrode polarization.

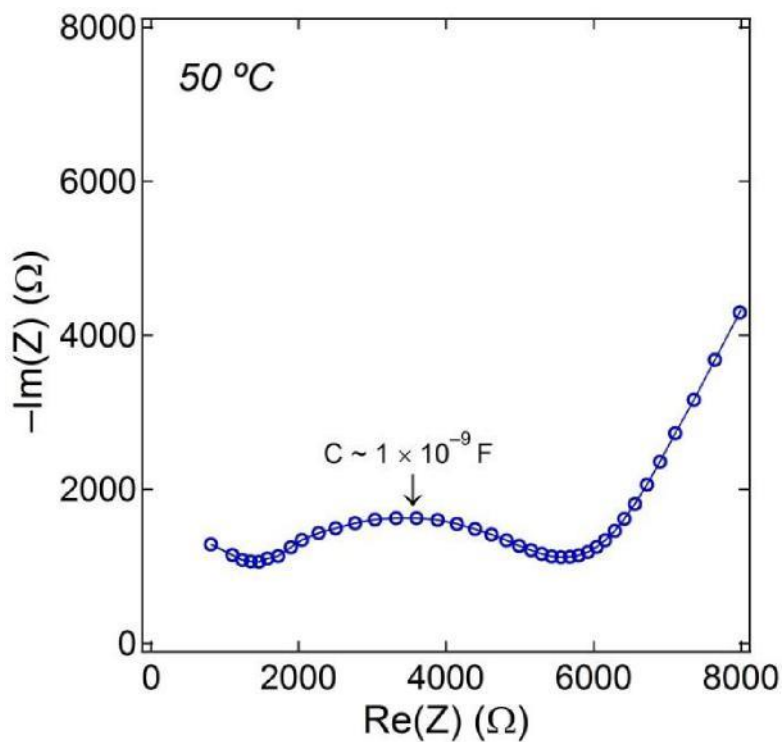

**Supplementary Figure 19** Nyquist plots of cold-pressed  $\text{Na}_{2.9}\text{H}(\text{Se}_{0.9}\text{I}_{0.1})$  pellet at  $50\text{ }^\circ\text{C}$ . The impedance spectrum at  $50\text{ }^\circ\text{C}$  features a small half-semicircle in the high-frequency region and a large semicircle from which the apex frequency is  $\sim 4.0 \times 10^4\text{ Hz}$  and the corresponding capacity is  $\sim 1.0 \times 10^{-9}\text{ F}$ . This is a typical value for the grain boundary capacitance of a sample (Irvine, J. T. S., Sinclair, D. C. & West, A. R. *Adv. Mater.* **1990**, *2*, 132– 138), and therefore the small half-semicircle with the associated resistance is attributed to the bulk properties of the  $\text{Na}_{2.9}\text{H}(\text{Se}_{0.9}\text{I}_{0.1})$ .

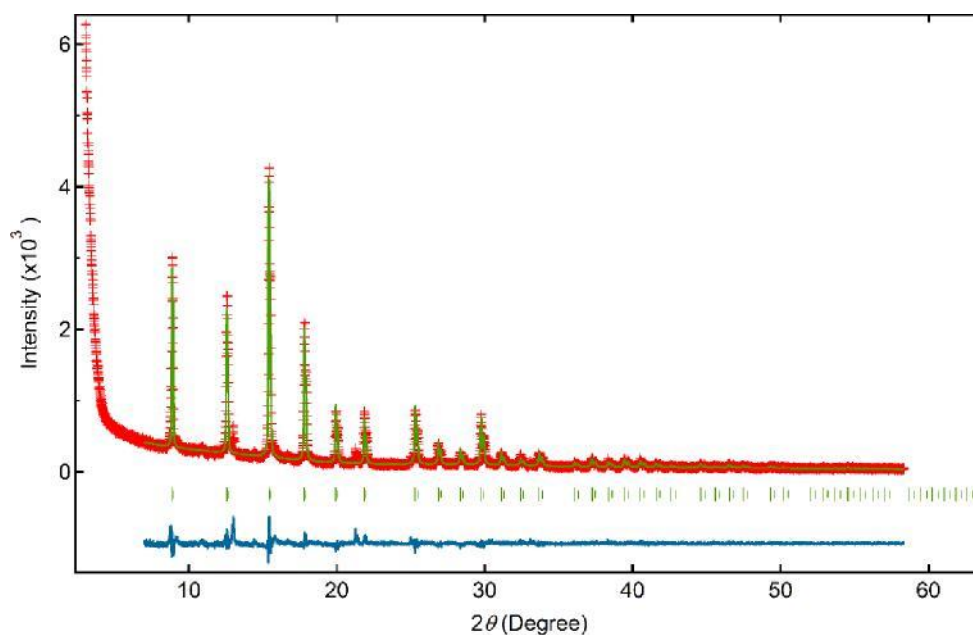

**Supplementary Figure 20** Rietveld refinement of XRD (Mo-K $\alpha$ ) pattern of Na<sub>2.9</sub>H(Se<sub>0.9</sub>I<sub>0.1</sub>). The red crosses, green solid line, the blue solid line, and green dashes denotes the observed, calculated, difference intensities and calculated Bragg reflections, respectively.

**Supplementary Table 10** Atomic coordinates, displacement parameters and occupancy factors for the cubic Na<sub>2.9</sub>H(Se<sub>0.9</sub>I<sub>0.1</sub>) using Mo-K $\alpha$  XRD<sup>a</sup>

| Atom | Site       | <i>x</i> | <i>y</i> | <i>z</i> | <i>U</i> <sub>iso</sub> (100 Å <sup>2</sup> ) | <i>g</i> |
|------|------------|----------|----------|----------|-----------------------------------------------|----------|
| Na   | 3 <i>d</i> | 0.5      | 0        | 0        | 4.91(15)                                      | 0.964(3) |
| Se   | 1 <i>b</i> | 0.5      | 0.5      | 0.5      | 2.67(5)                                       | 0.892(8) |
| I    | 1 <i>b</i> | 0.5      | 0.5      | 0.5      | 2.67(5)                                       | 0.108(8) |
| H    | 1 <i>a</i> | 0        | 0        | 0        | 1*                                            | 1        |

<sup>a</sup>Space group  $\mathcal{F}m\bar{3}m$  (No. 221),  $a = 4.57627(16)$  Å.  $R_{wp} = 11.84\%$ ,  $GOF = 1.57$ ,  $R_{Bragg} = 5.17\%$  and  $R_f = 3.89\%$  for XRD using JANA2006 program. In order to preserve the charge neutrality of the structure, the refinement was constrained using the equation:  $3g(\text{Na}) = 2g(\text{Se}) + g(\text{I}) + g(\text{H})$ . The refined composition is Na<sub>2.892(9)</sub>HSe<sub>0.892</sub>I<sub>0.108</sub>.

\*The isotropic displacement parameter is not refined.

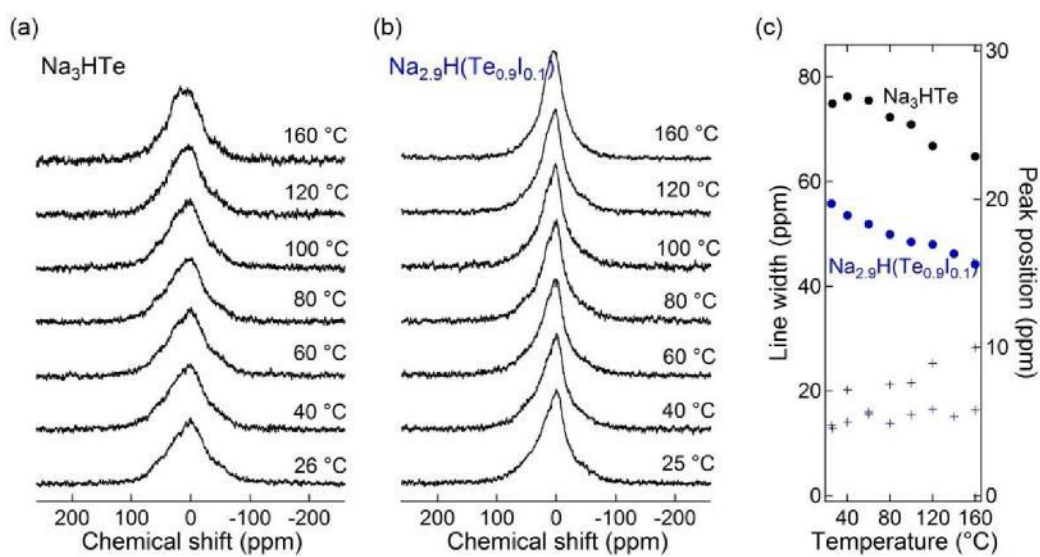

**Supplementary Figure 21** Temperature-variable  $^{23}\text{Na}$  static NMR spectra of (a) pristine  $\text{Na}_3\text{HTe}$  and (b)  $\text{Na}_{2.9}\text{H}(\text{Te}_{0.9}\text{I}_{0.1})$  recorded under 7 T magnetic field. (c) Temperature dependence of their line width (circle) and peak position (cross).

## Section 10. Supplementary references

- S1. Chern, M. Y.; Vennos, D. A.; Disalvo, F. J. Synthesis, Structure, and Properties of Anti-Perovskite Nitrides  $\text{Ca}_3\text{MN}$ ,  $\text{M}=\text{P}$ ,  $\text{As}$ ,  $\text{Sb}$ ,  $\text{Bi}$ ,  $\text{Ge}$ ,  $\text{Sn}$ , and  $\text{Pb}$ . *J. Solid State Chem.* **1992**, *96*, 415–425.
- S2. Widera, A.; Schäfer, H. Übergangsformen Zwischen Zintlphasen Und Echten Salzen: Die Verbindungen  $\text{A}_3\text{BO}$  (MIT  $\text{A} = \text{Ca}$ ,  $\text{Sr}$ ,  $\text{Ba}$  Und  $\text{B} = \text{Sn}$ ,  $\text{Pb}$ ). *Mater. Res. Bull.* **1980**, *15*, 1805–1809.
- S3. Velden, A.; Jansen, M. Zur Kenntnis Der Inversen Perowskite  $\text{M}_3\text{TO}$  ( $\text{M} = \text{Ca}$ ,  $\text{Sr}$ ,  $\text{Yb}$ ;  $\text{T} = \text{Si}$ ,  $\text{Ge}$ ,  $\text{Sn}$ ,  $\text{Pb}$ ). *Zeitschrift für Anorg. und Allg. Chemie* **2004**, *630*, 234–238.
- S4. Quilty, C. D.; Avdeev, M.; Driskell, J. D.; Sullivan, E. Structural Characterization and Photoluminescence in the Rare Earth-Free Oxy-Fluoride Anti-Perovskites  $\text{Sr}_{3-x}\text{Bi}_{2x/3}\text{AlO}_4\text{F}$  and  $\text{Sr}_{3-x}\text{Bi}_{2x/3}\text{GaO}_4\text{F}$ . *Dalt. Trans.* **2017**, *46*, 4055–4065.
- S5. Prado-Gonjal, J.; Schmidt, R.; Romero, J. J.; Ávila, D.; Amador, U.; Morán, E. Microwave-Assisted Synthesis, Microstructure, and Physical Properties of Rare-Earth Chromites. *Inorg. Chem.* **2013**, *52*, 313–320.
- S6. Coutinho, P. V.; Cunha, F.; Barrozo, P. Structural, Vibrational and Magnetic Properties of the Orthoferrites  $\text{LaFeO}_3$  and  $\text{YFeO}_3$ : A Comparative Study. *Solid State Commun.* **2017**, *252*, 59–63.
- S7. Pagnier, T.; Charrier-Cougoulic, I.; Ritter, C.; Lucazeau, G. A Neutron Diffraction Study of  $\text{BaCe}_x\text{Zr}_{1-x}\text{O}_3$ . *Eur. Phys. J. Appl. Phys.* **2000**, *9*, 1–9.
- S8. Koopmans, H. J. A.; Van De Velde, G. M. H.; Gellings, P. J. Powder Neutron Diffraction Study of the Perovskites  $\text{CaTiO}_3$  and  $\text{CaZrO}_3$ . *Acta Cryst.* **1983**, *C39*, 1323–1325.
